# Supplementary material
Source: PubMed Central journal article supplement (PMC7574788)
Supplement: mmc1.pdf [file mmc1.pdf]

## Supplementary Information:

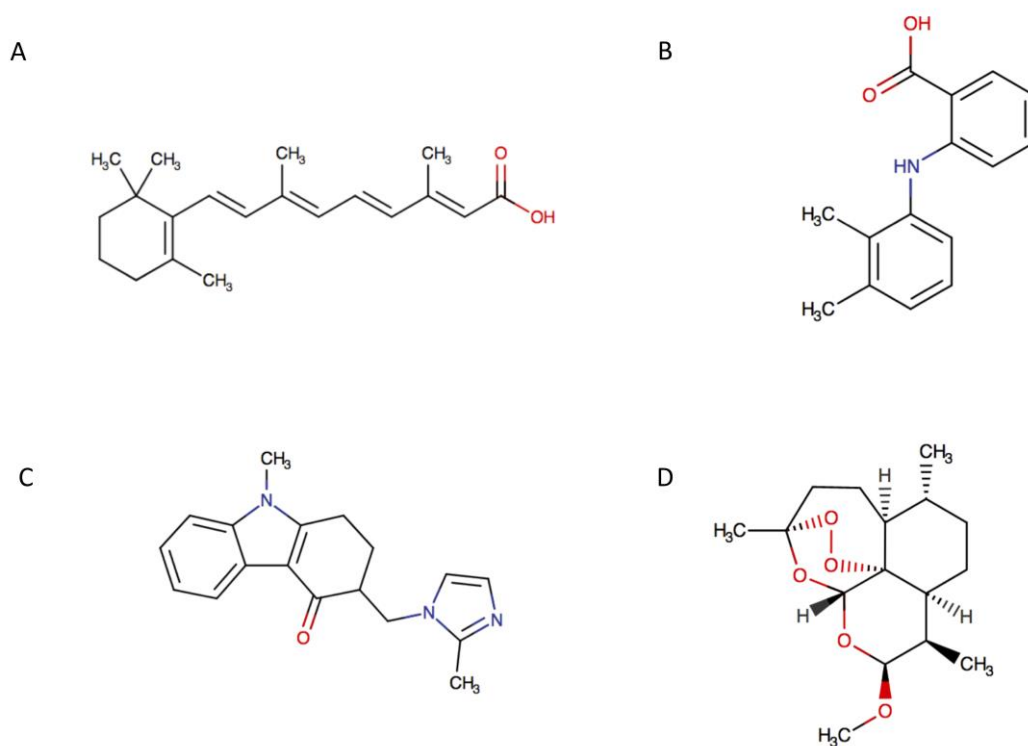

Supplementary Figure S1: 2D chemical structure of (A) Tretinoin, (B) Mefenamic acid, (C) Ondansetron and (D) Artemether.

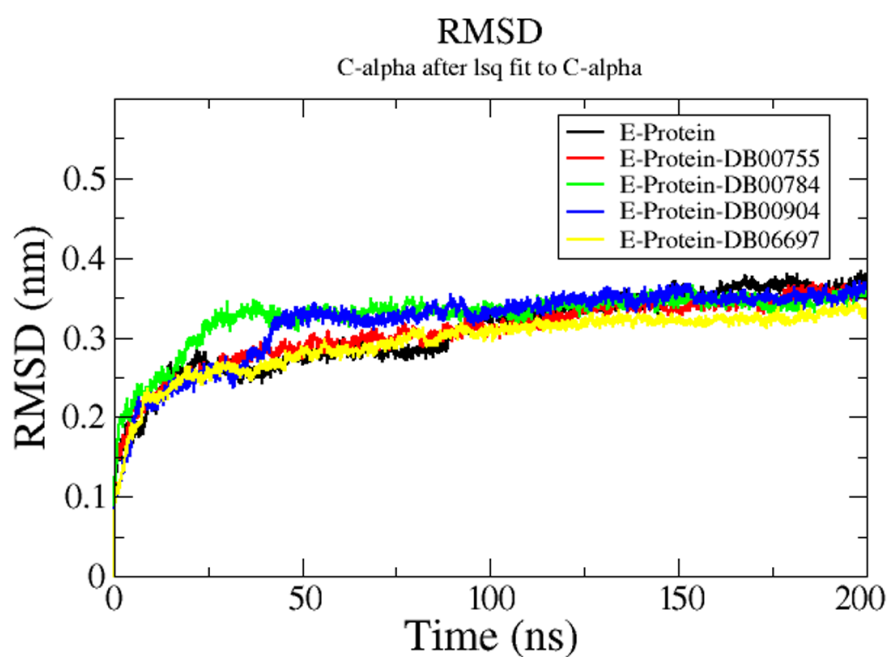

Supplementary Figure S2: RMSD analysis of SARS-CoV-2 E apo form and drug complexes during simulation (representative run).

Supplementary Table 1: Selected list of FDA-approved drugs.

| S.No. | Drug ID |
|-------|---------|
| 1     | DB00377 |
| 2     | DB00755 |
| 3     | DB00972 |
| 4     | DB00985 |
| 5     | DB01619 |
| 6     | DB00751 |
| 7     | DB09274 |
| 8     | DB00904 |
| 9     | DB06697 |
| 10    | DB00784 |
| 11    | DB00670 |
| 12    | DB09216 |
| 13    | DB00934 |
| 14    | DB00266 |
| 15    | DB00216 |

Supplementary Table 2: Binding energy values of Tretinoin (2LBD) and Mefenamic acid (5IKR) bound to their respective targets.

| PDB ID      | Binding Energy (kJ/mol)   | Electrostatic Energy (kJ/mol) | Polar Solvation Energy (kJ/mol) | Van der waal's Energy (kJ/mol) | SASA Energy (kJ/mol)    |
|-------------|---------------------------|-------------------------------|---------------------------------|--------------------------------|-------------------------|
| <b>2LBD</b> | <b>-85.8</b><br>+/- 13.26 | <b>-131.6</b><br>+/- 29.0     | <b>250.9</b><br>+/- 20.2        | <b>-185.7</b><br>+/- 13.9      | <b>-19.3</b><br>+/- 0.8 |
| <b>5IKR</b> | <b>-178.2</b><br>+/- 12.6 | <b>-236.8</b><br>+/- 13.2     | <b>250.5</b><br>+/- 11.5        | <b>-177.4</b><br>+/- 11.5      | <b>-14.5</b><br>+/- 0.6 |

Supplementary Table 3: Binding energy values of the four ligands in complex with SARS CoV-2 E protein (triplicate runs).

| DRUG ID | Binding Energy (kJ/mol) | Electrostatic Energy (kJ/mol) | Polar Solvation Energy (kJ/mol) | Van der waal's Energy (kJ/mol) | SASA Energy (kJ/mol) |
|---------|-------------------------|-------------------------------|---------------------------------|--------------------------------|----------------------|
| DB00755 | -400.7                  | -478.5                        | 262.1                           | -166.4                         | -17.7                |
|         | +/- 11.7                | +/- 11.4                      | +/- 7.9                         | +/- 13.1                       | +/- 0.9              |
|         | -391.6                  | -430.9                        | 268.6                           | -193.2.4                       | -18.9                |
|         | +/- 10.7                | +/- 13.6                      | +/- 11.5                        | +/- 11.7                       | +/- 0.8              |
| DB00784 | -379.5                  | -426.1                        | 245.1                           | -183.4                         | -15.1                |
|         | +/-10.5                 | +/-                           | +/-6.5                          | +/-10.7                        | +/-0.7               |
|         | -372.1                  | -432.3                        | 257.1                           | -182.8                         | 14.8                 |
|         | +/-13.9                 | +/-11.4                       | +/-7.9                          | +/-12.1                        | +/-0.6               |
| DB00904 | -222.4                  | 0.3                           | 22.3                            | -227.8                         | -17.2                |
|         | +/-9.2                  | +/-0.8                        | +/-1.9                          | +/-9.5                         | +/-0.8               |
|         | -220.2                  | -0.9                          | 21.1                            | -223.5                         | -16.9                |
|         | +/-8.4                  | +/-0.9                        | +/-2.6                          | +/-8.9                         | 0.9                  |
| DB06697 | -172.1                  | -2.0                          | 36.6                            | -191.7                         | -14.9                |
|         | +/-11.2                 | +/-3.0                        | +/-5.7                          | +/-9.8                         | +/-0.7               |
|         | -166.6                  | -0.7                          | 27.3                            | -177.7                         | -15.5                |
|         | +/-7.3                  | +/-1.0                        | +/-4.0                          | +/-7.8                         | 0.8                  |
